# Supplementary material
Source: PubMed Central journal article supplement (PMC7006226)
Supplement: NIHMS1545441-supplement-10.pdf [file NIHMS1545441-supplement-10.pdf]

| Protein | Plasmid | Tag   | Expression host | Denaturing prep | IB <sup>a</sup> dissolved | SP/Q/Ni in 6M urea pH 7 | Refolding buffer                                   | Heparin column | S75 | Final buffer                                       |
|---------|---------|-------|-----------------|-----------------|---------------------------|-------------------------|----------------------------------------------------|----------------|-----|----------------------------------------------------|
| S2      | pRSF-1b | no    | Bl21Gold(DE3)   | yes             | 8M urea                   | Q                       | 20 mM TrisHCL pH 8.3, 20 mM NaCL, 0.5 mM EDTA/DTT  | yes            | yes | 20 mM TrisHCL pH 7.6, 150 mM NaCl, 0.5 mM EDTA/DTT |
| S3      | pRSF-1b | no    | Bl21Tuner(DE3)  | yes             | 6M Gua                    | SP                      | 20 mM TrisHCL pH 7.6, 20 mM NaCL, 0.5 mM EDTA      | yes            | yes | 20 mM TrisHCL pH 7.6, 20 mM NaCl, 0.5 mM EDTA/DTT  |
| S7      | pRSF-1b | no    | Bl21Gold(DE3)   | yes             | 6M Gua                    | SP                      | 20 mM TrisHCL pH 7.6, 20 mM NaCL, 0.5 mM EDTA/DTT  | yes            | yes | 20 mM TrisHCL pH 7.6, 100 mM NaCl, 0.5 mM EDTA/DTT |
| S9      | pRSF-1b | 6xHis | Bl21Gold(DE3)   | yes             | 6M Gua                    | Ni/SP                   | 20 mM TrisHCL pH 7.6, 20 mM NaCL, 0.5 mM EDTA/DTT  | no             | yes | 20 mM TrisHCL pH 7.6, 50 mM NaCl, 0.5 mM EDTA/DTT  |
| S10     | pRSF-1b | no    | Bl21Tuner(DE3)  | yes             | 8M urea                   | SP                      | 20 mM TrisHCL pH 7.0, 5% glycerol, 0.5 mM EDTA     | no             | yes | 20 mM TrisHCL pH 7.0, 0 mM NaCl, 0.5 mM EDTA       |
| S13     | pRSF-1b | no    | Bl21Gold(DE3)   | yes             | 6M Gua                    | SP                      | 20 mM TrisHCL pH 7.6, 100 mM NaCL, 0.5 mM EDTA/DTT | no             | yes | 20 mM TrisHCL pH 7.6, 100 mM NaCl, 0.5 mM EDTA/DTT |
| S14     | pRSF-1b | no    | Bl21Gold(DE3)   | yes             | 6M Gua                    | SP                      | 20 mM TrisHCL pH 7.6, 20 mM NaCL, 0.5 mM EDTA/DTT  | yes            | yes | 20 mM TrisHCL pH 7.6, 150 mM NaCl, 0.5 mM EDTA/DTT |
| S19     | pRSF-1b | no    | Bl21Gold(DE3)   | yes             | 6M Gua                    | SP                      | 20 mM TrisHCL pH 7.6, 20 mM NaCL, 0.5 mM EDTA/DTT  | yes            | yes | 20 mM TrisHCL pH 7.6, 100 mM NaCl, 0.5 mM EDTA/DTT |

**Table S1. Related to STAR Methods.**

Overview of r-protein expression and purification. <sup>a</sup> inclusion bodies.
