# Supplementary material
Source: PubMed Central journal article supplement (PMC7006226)

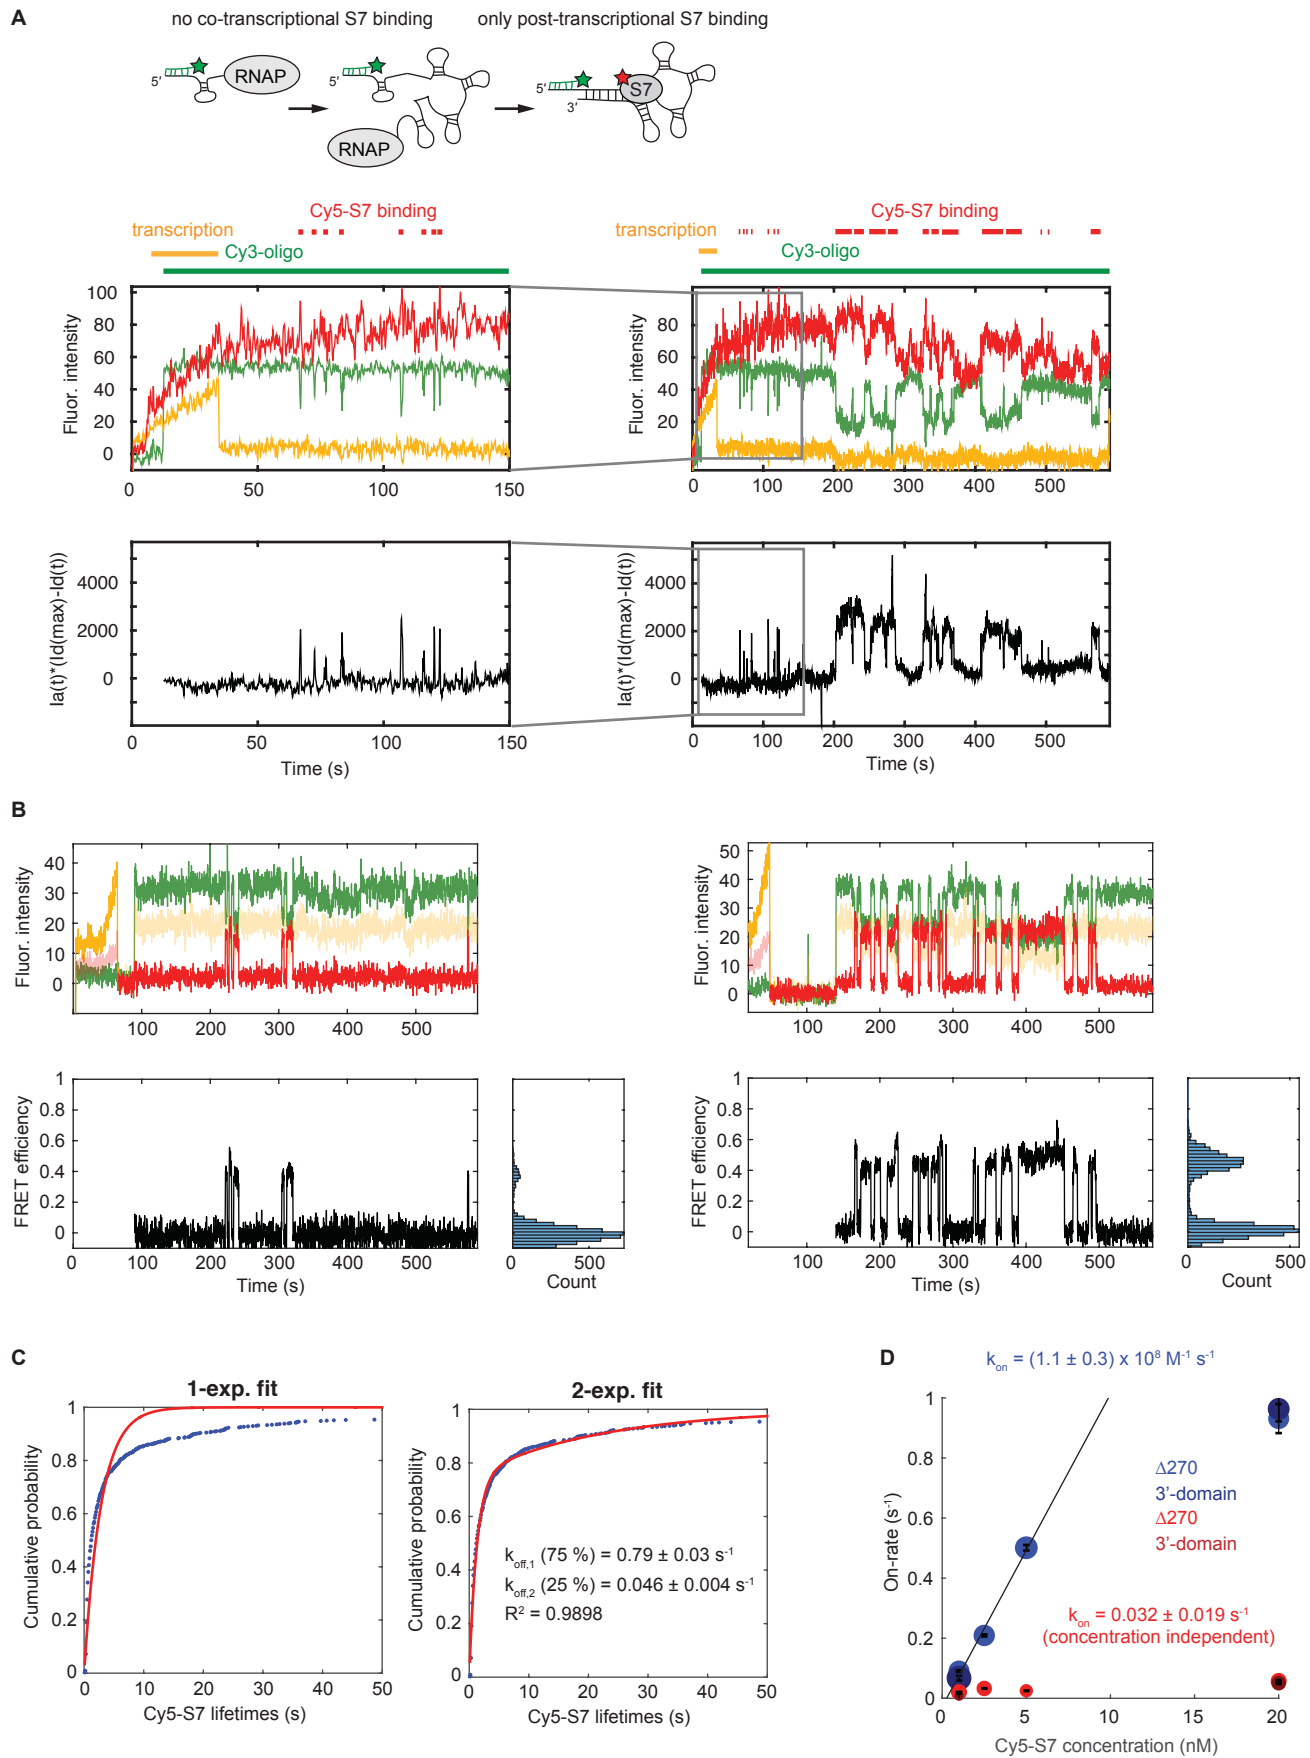

Fig. S1

Supplement: NIHMS1545441-supplement-3.pdf [file NIHMS1545441-supplement-3.pdf]

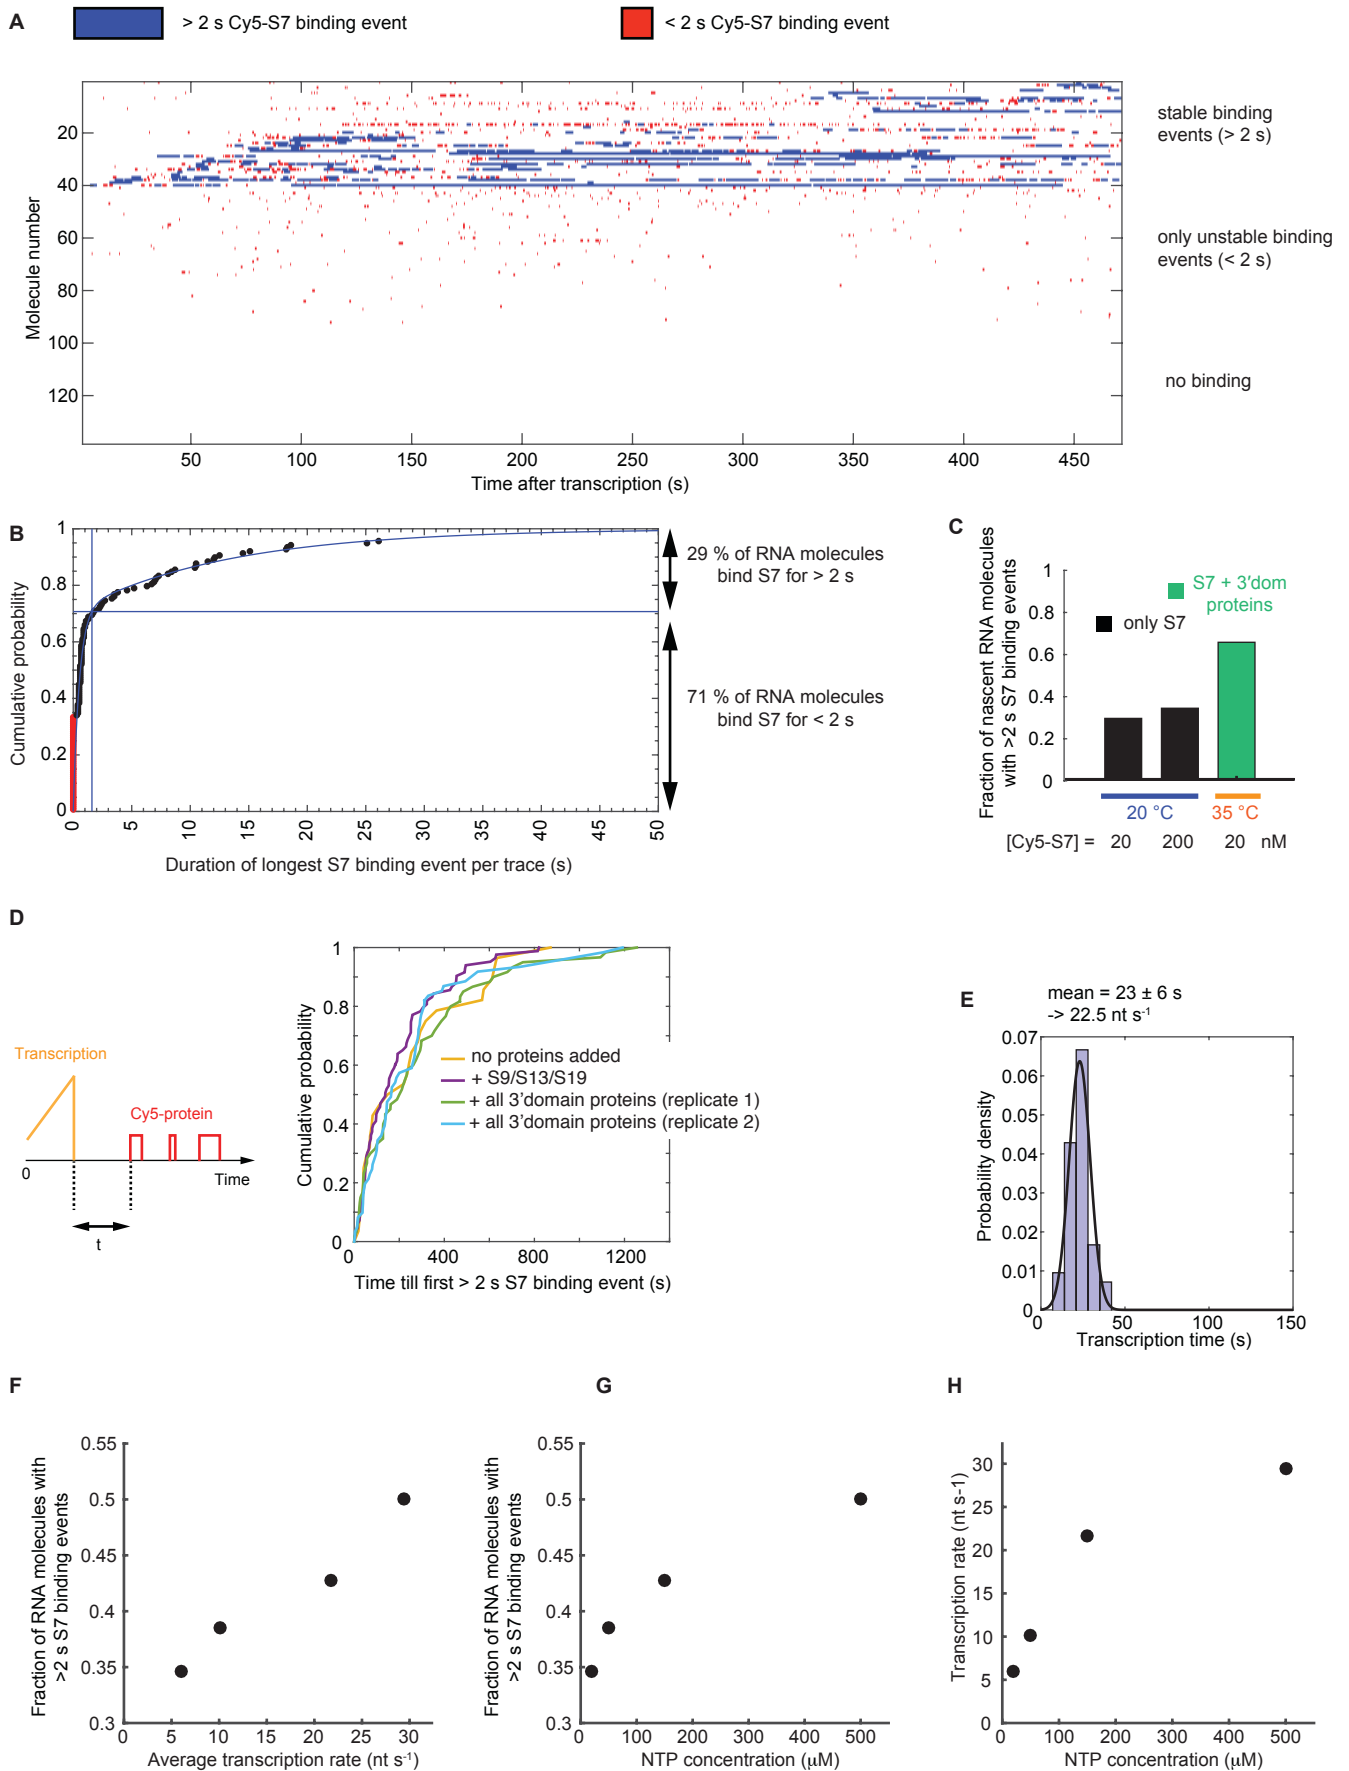

Fig. S2

Supplement: NIHMS1545441-supplement-4.pdf [file NIHMS1545441-supplement-4.pdf]

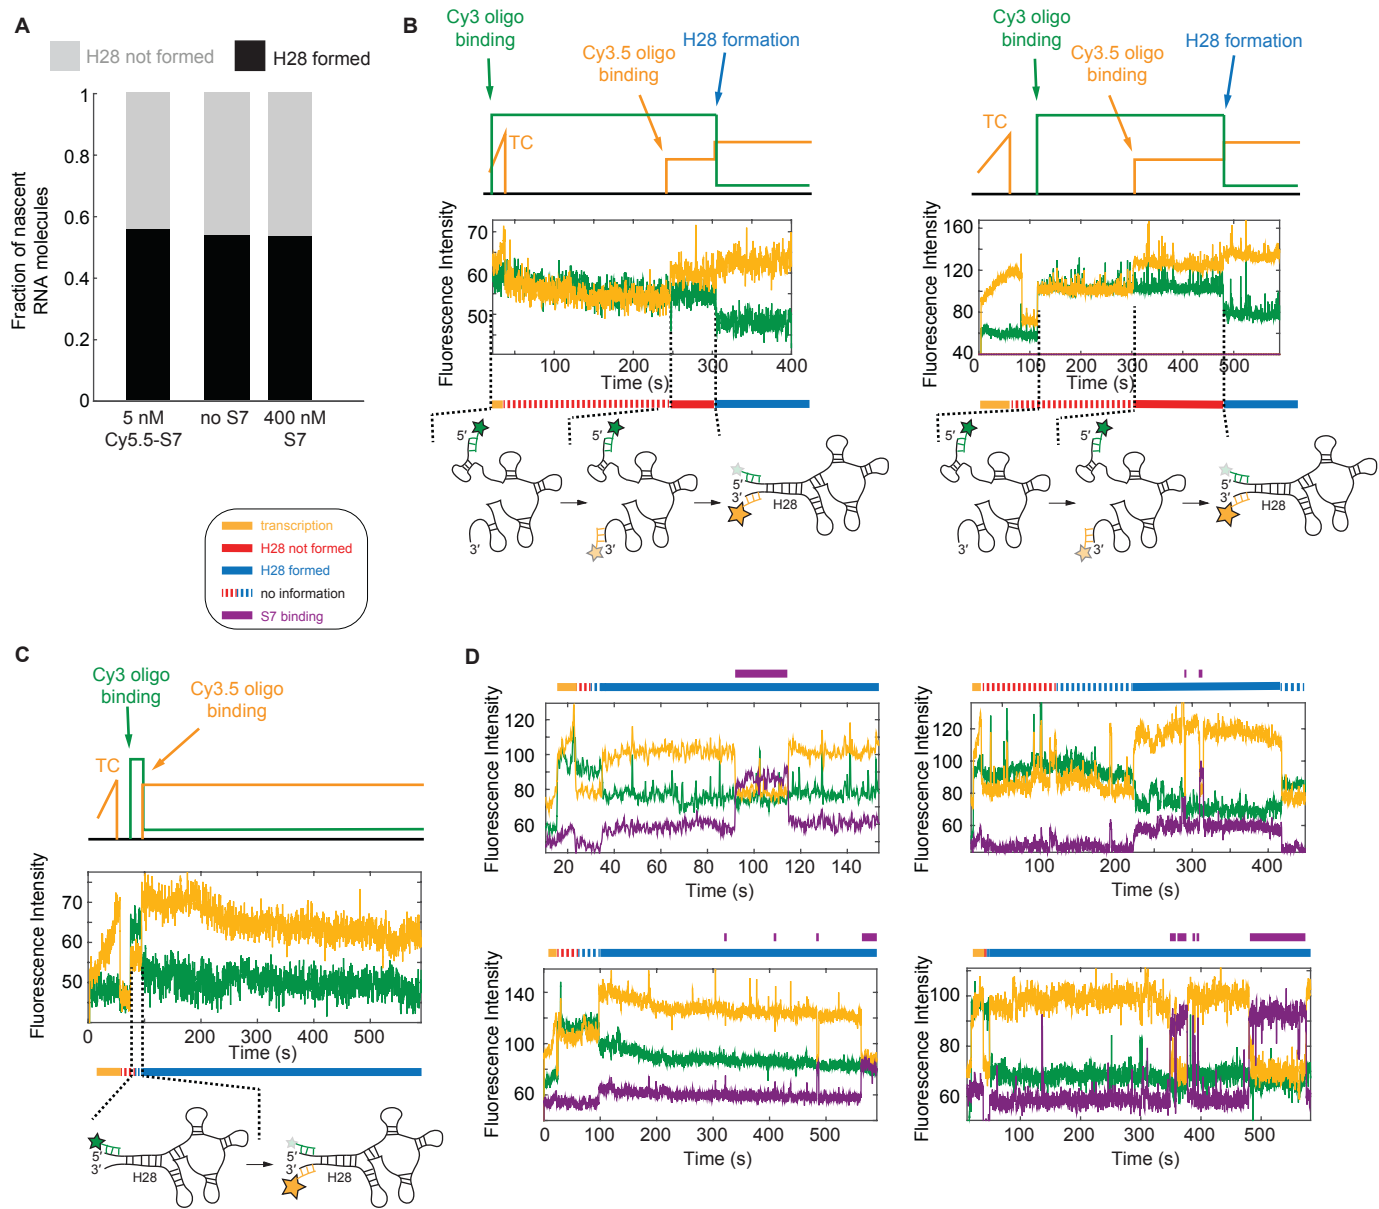

Fig. S3

Supplement: NIHMS1545441-supplement-5.pdf [file NIHMS1545441-supplement-5.pdf]

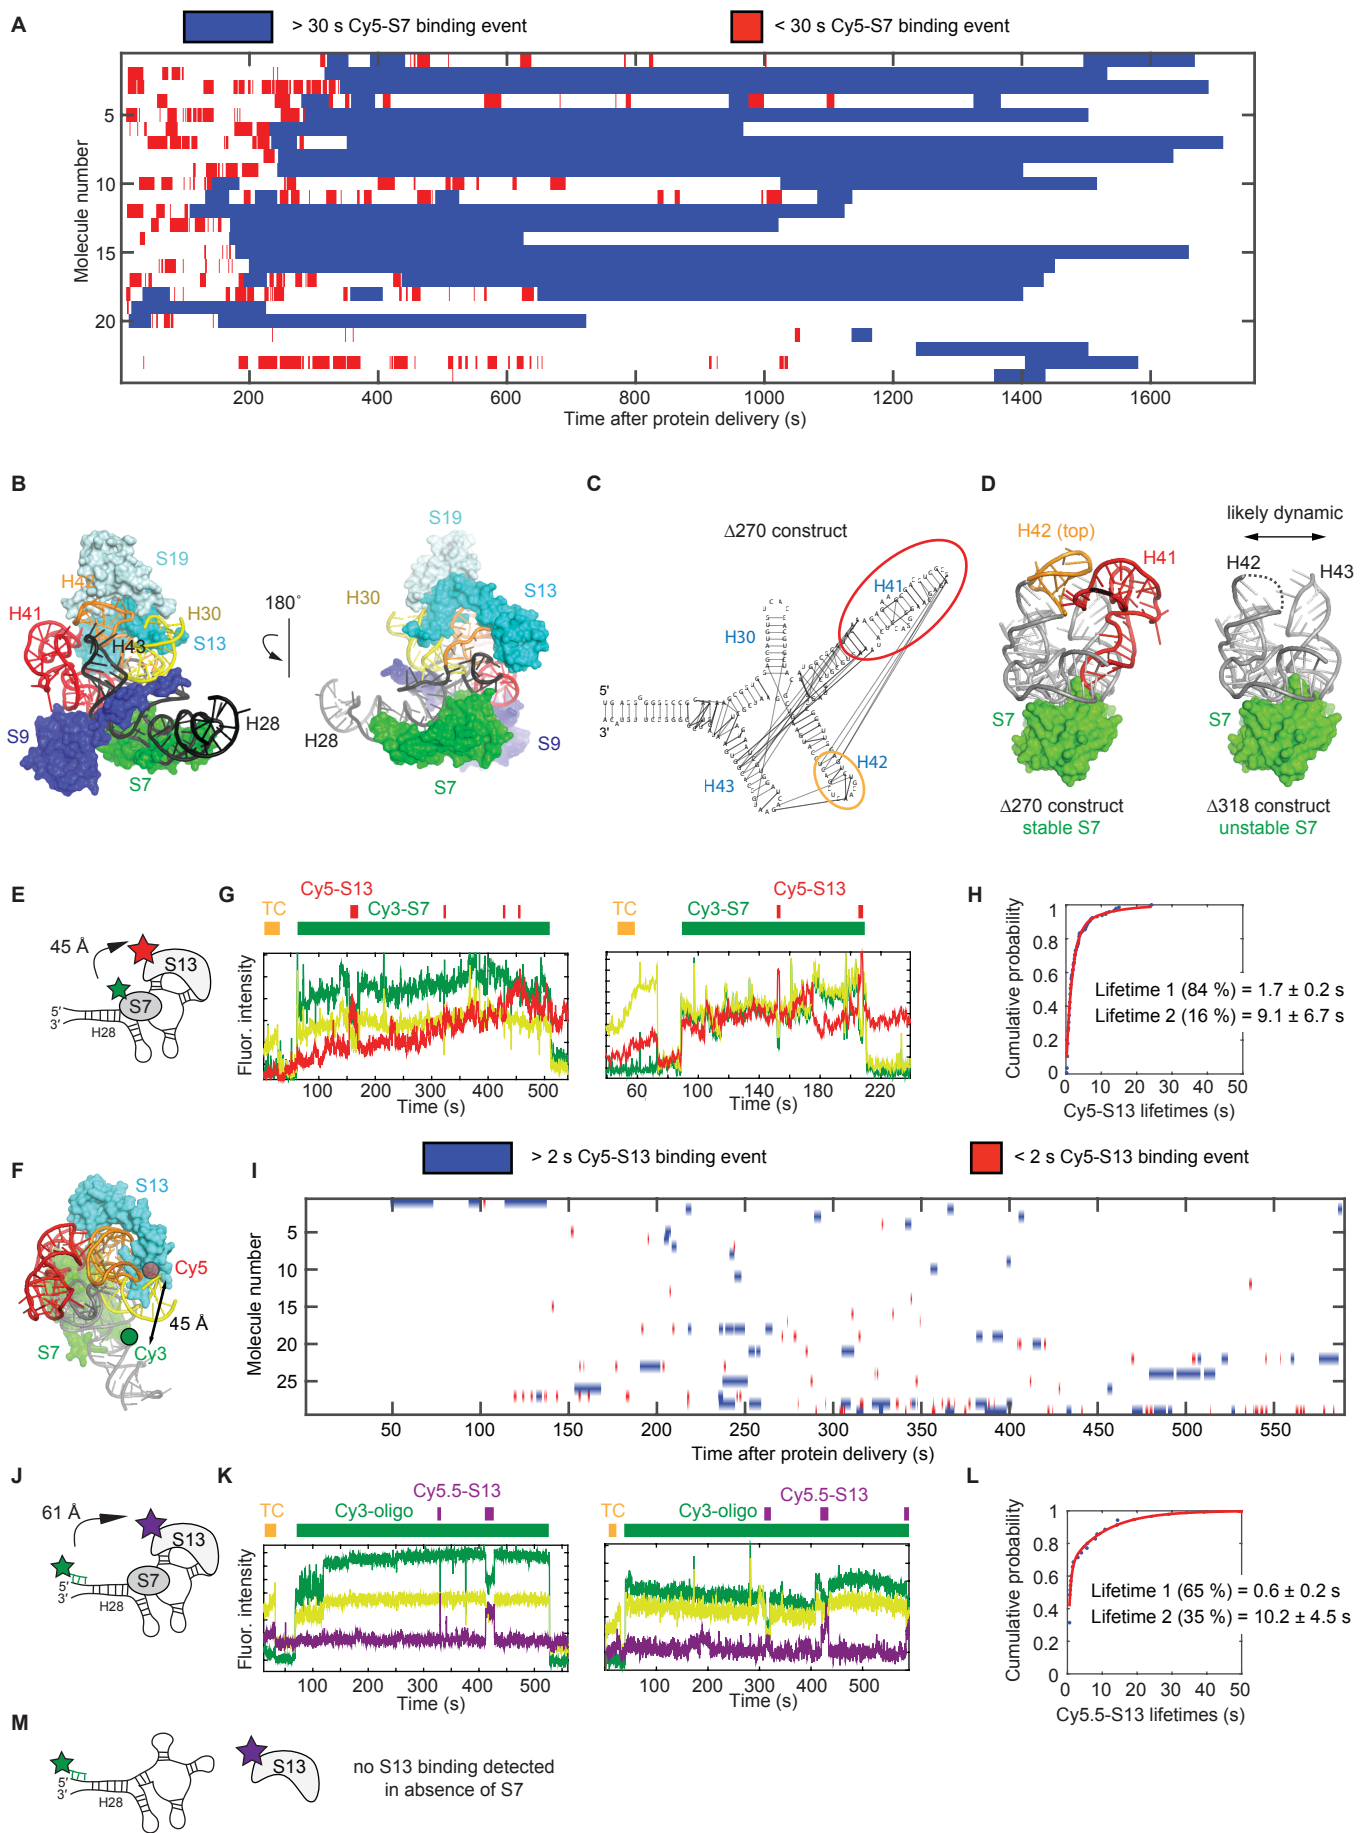

Fig. S4

Supplement: NIHMS1545441-supplement-6.pdf [file NIHMS1545441-supplement-6.pdf]

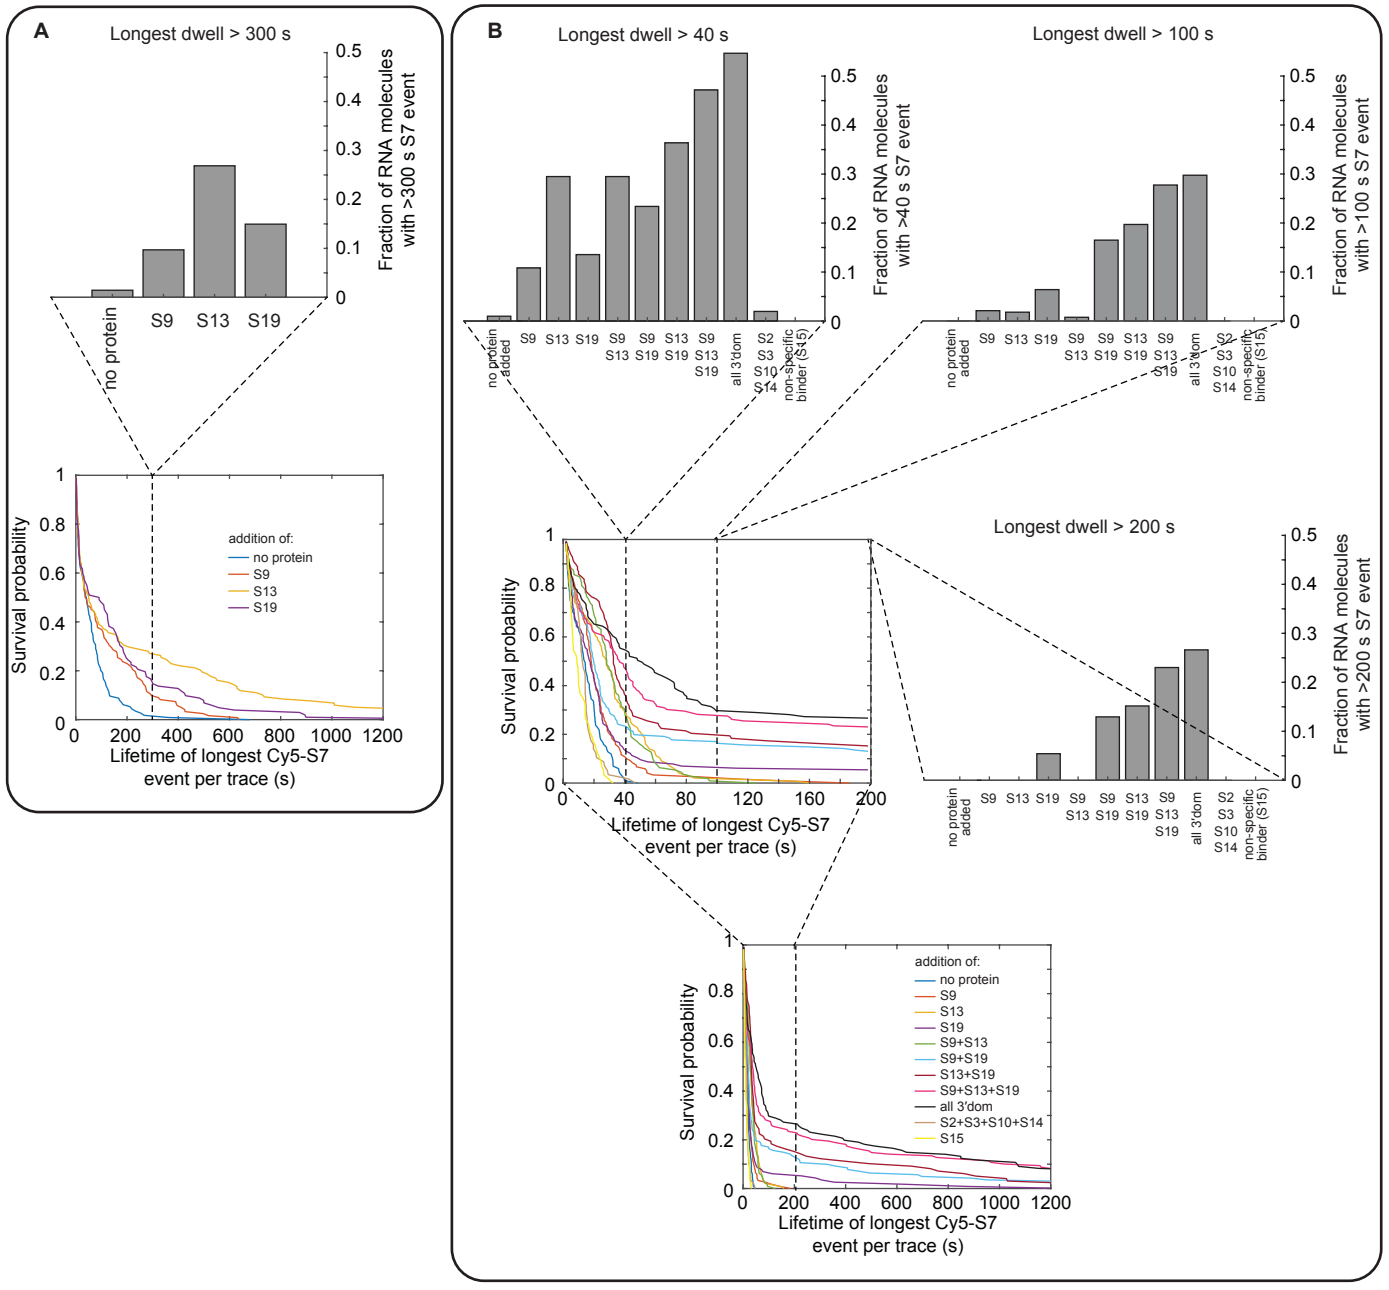

Fig. S5

Supplement: NIHMS1545441-supplement-7.pdf [file NIHMS1545441-supplement-7.pdf]

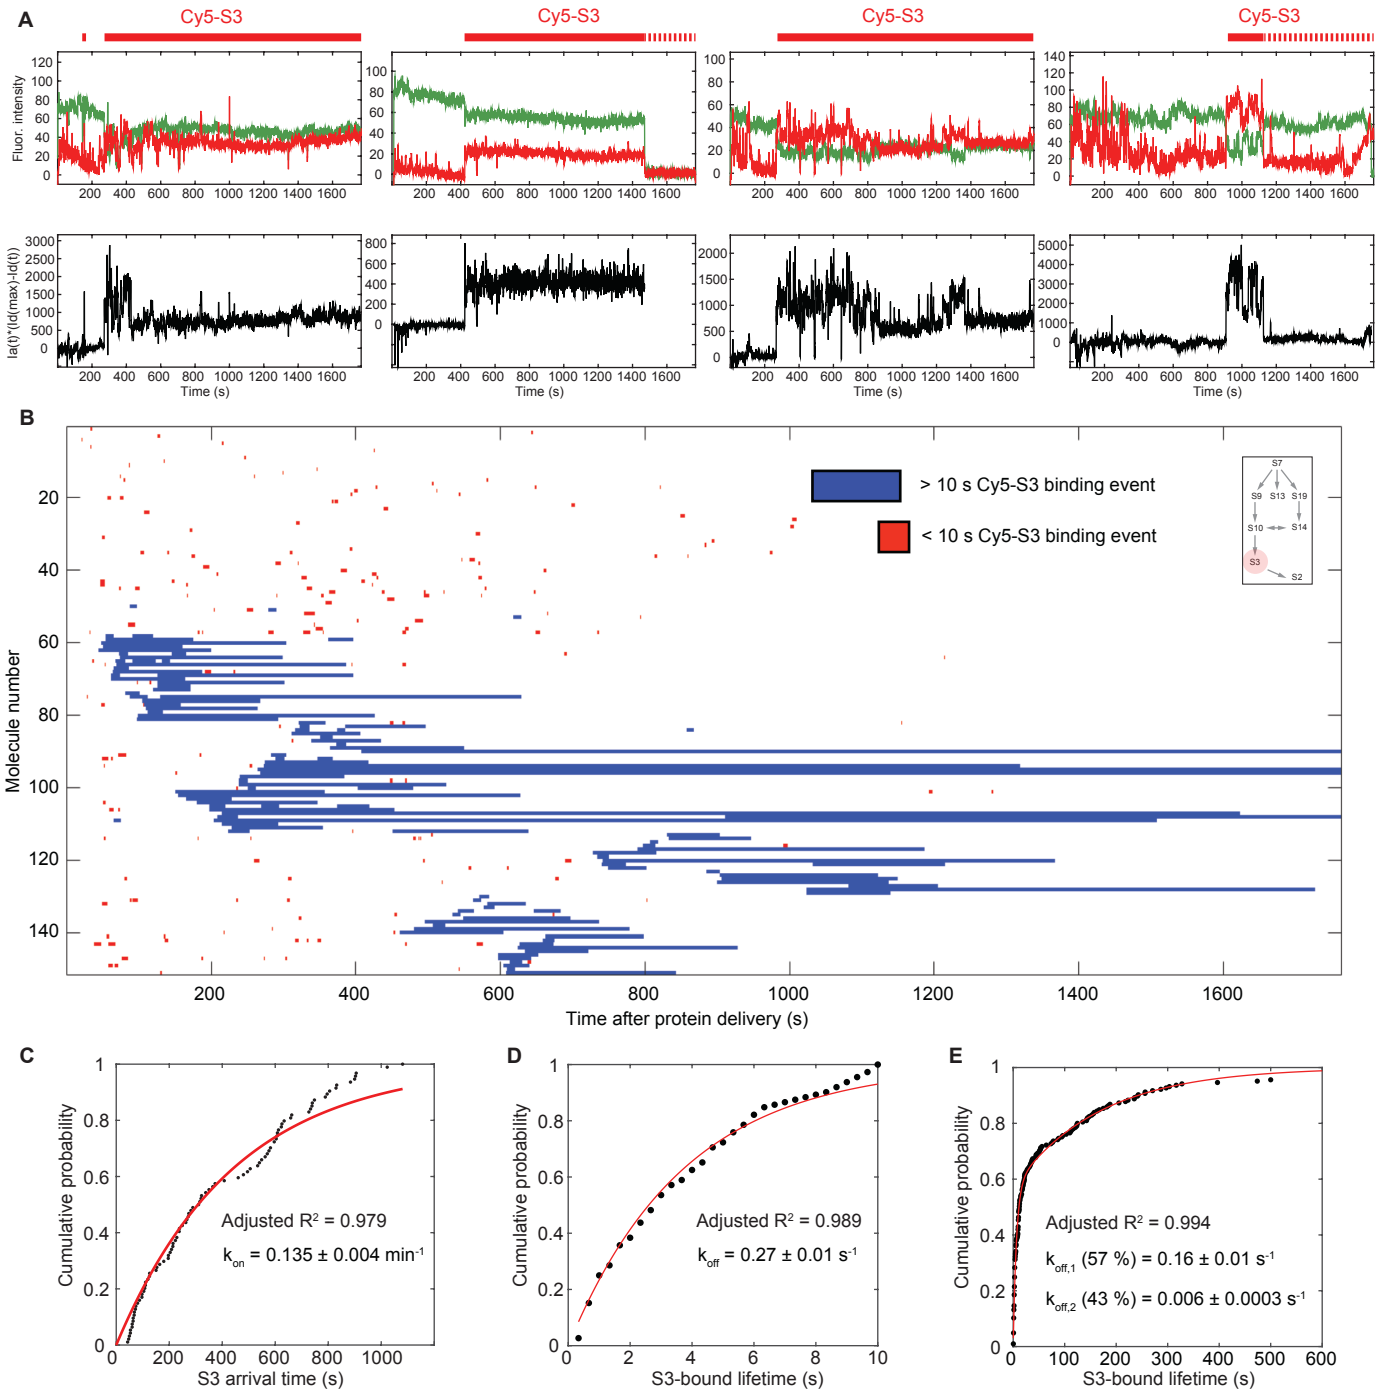

Fig. S6

Supplement: NIHMS1545441-supplement-8.pdf [file NIHMS1545441-supplement-8.pdf]

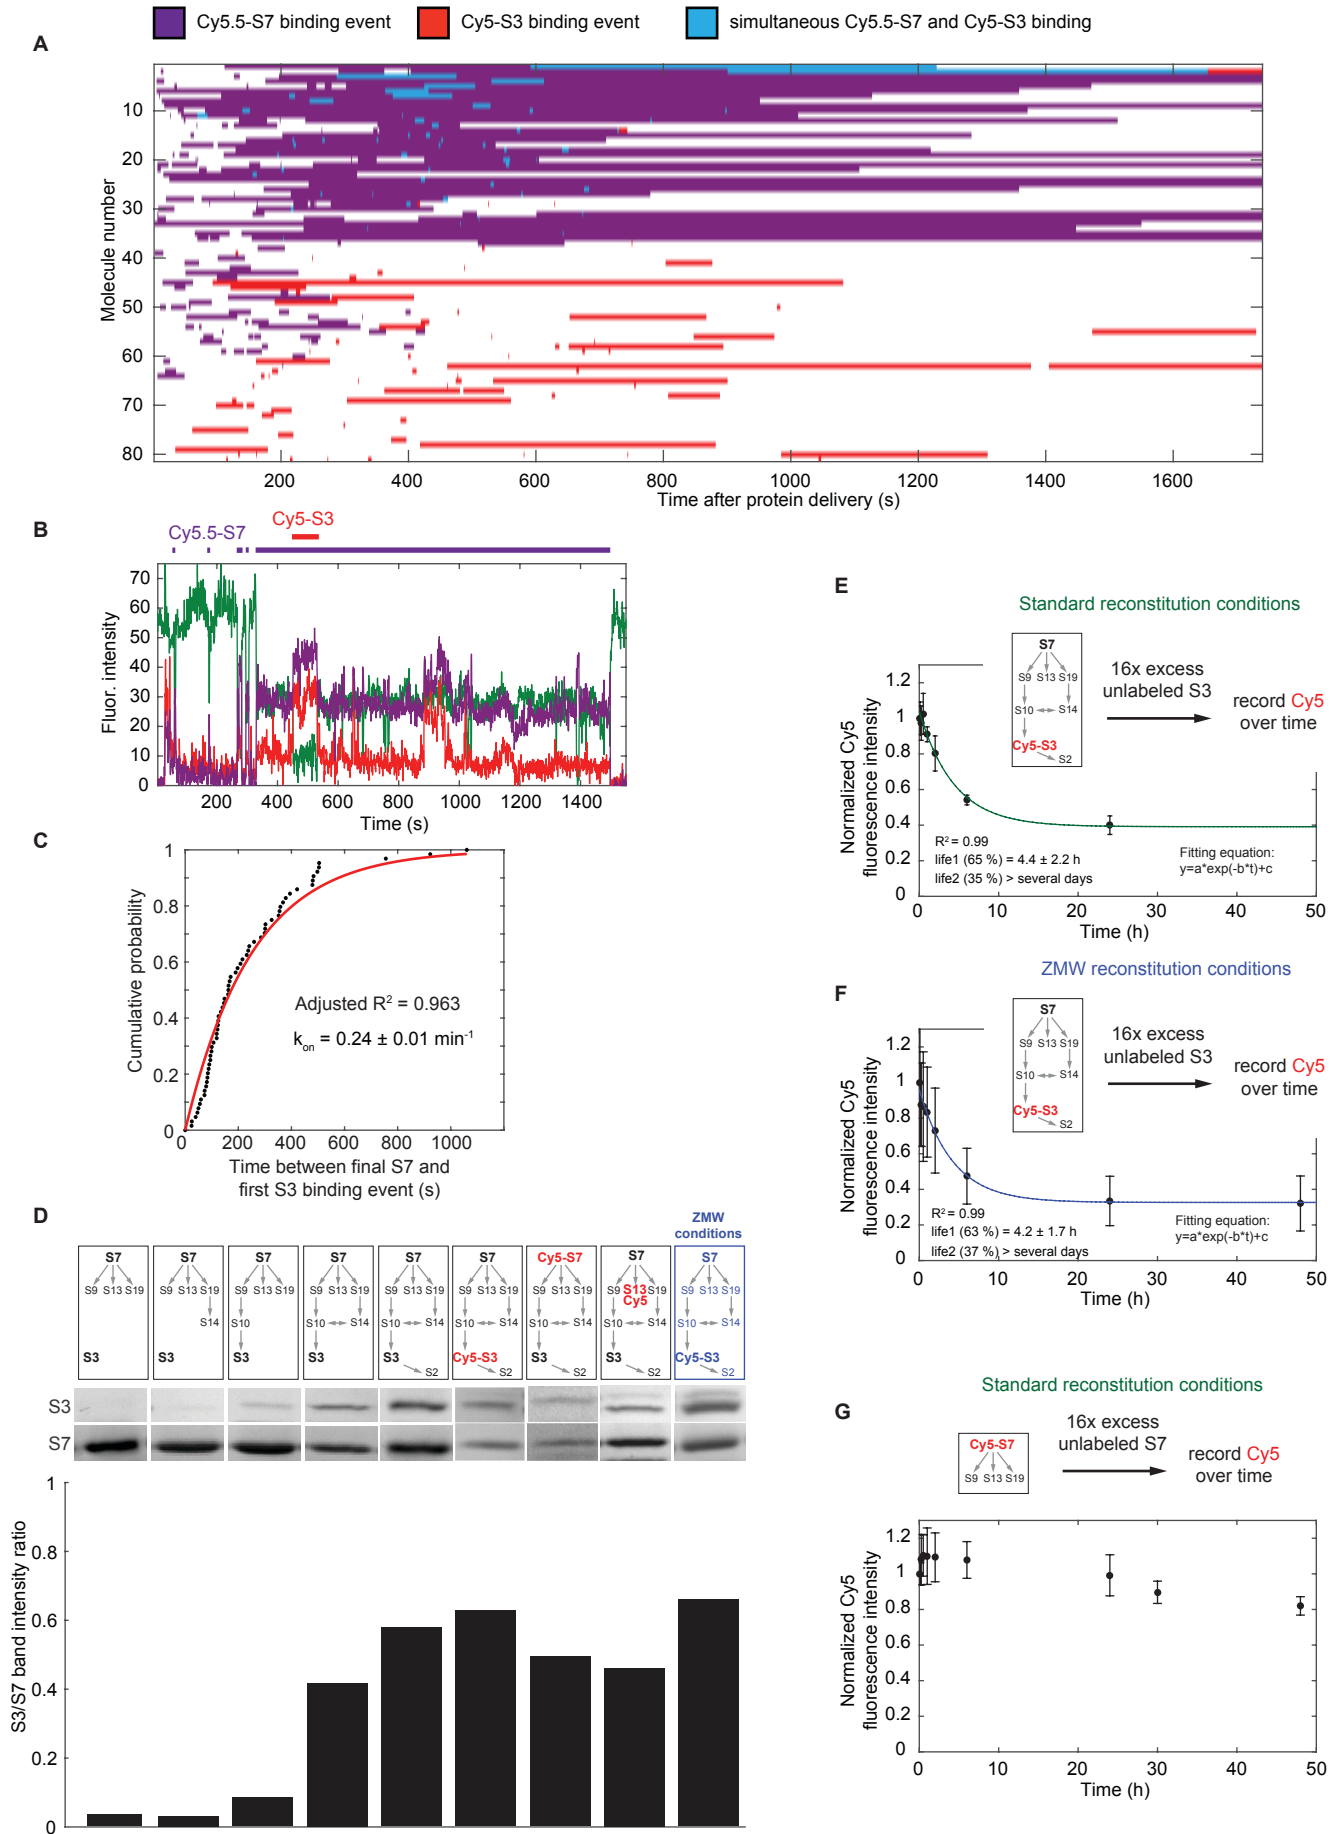

Fig. S7

Supplement: NIHMS1545441-supplement-9.pdf [file NIHMS1545441-supplement-9.pdf]
